# Supplementary material
Source: PubMed Central journal article supplement (PMC4217450)
Supplement: pnas.201412271SI.pdf [file pnas.201412271SI.pdf]

# Supporting Information

Xue et al. 10.1073/pnas.1412271111

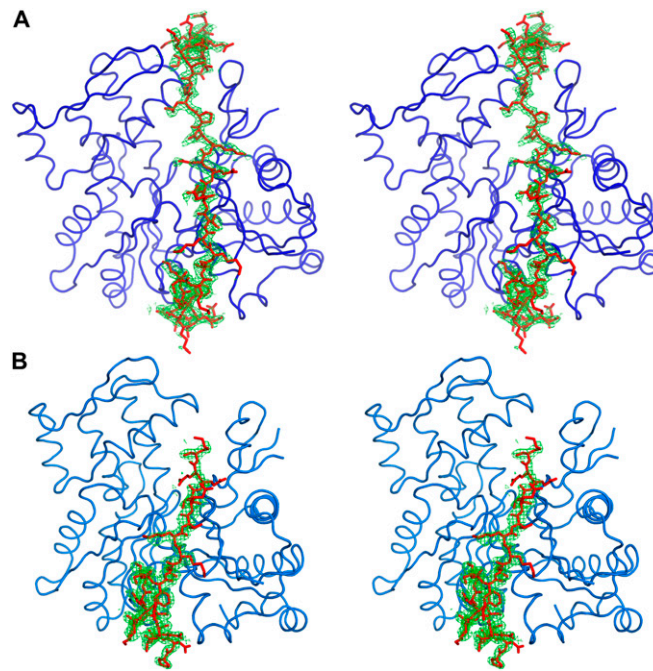

**Fig. S1.** Stereograms of the two structures of T $\beta$ 4:actin (cf. Fig. 1). (A) Structure of *Pichia* actin-T $\beta$ 4. (B) Structure of T $\beta$ 4-Cobl hybrid peptide in complex with rabbit skeletal muscle actin. In both A and B, actin is shown as a  $\alpha$  trace; T $\beta$ 4 is shown as red sticks, with its composite omit 2Fo-Fc map contoured at 1.0  $\sigma$  and colored green.

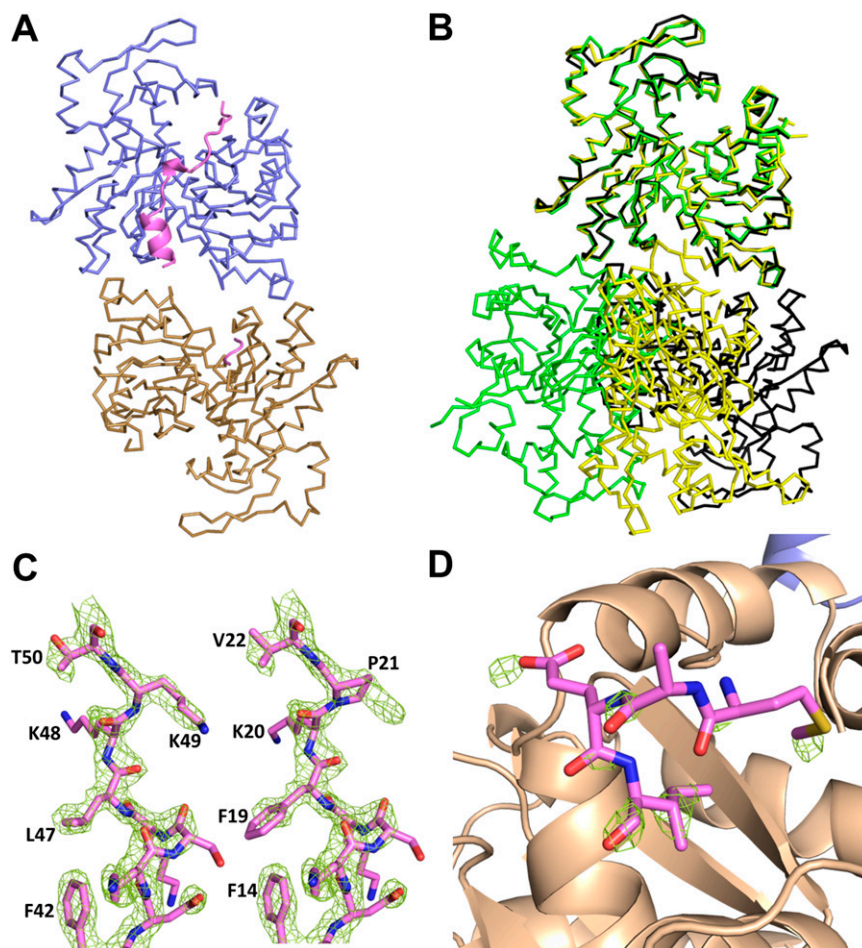

**Fig. S2.** Structure of the T $\beta$ 4-Cobl hybrid peptide in complex with rabbit skeletal muscle actin. (A) There are two actin molecules (blue and gold) in the asymmetric unit forming an antiparallel dimer. The hybrid peptide is in pink. (B) The antiparallel actin dimer reported here (black) is different from those induced by polylysine (PDB ID code 1LCU; yellow) and toxofilin (PDB ID code 2Q97; green). (C) Portion of the Fo-Fc omit map, contoured at 3.0  $\sigma$ , shows unambiguously that the central portions of the visible residues on the surface of the first actin molecule are (*Left*) 42–50 (FDKSKLKKT) but (*Right*) not 14–22 (FDKSKFKPV) of the hybrid peptide. (D) The same omit map shows weak density at the barbed face of the second actin, which is assigned to residues 8–11 of the hybrid peptide.





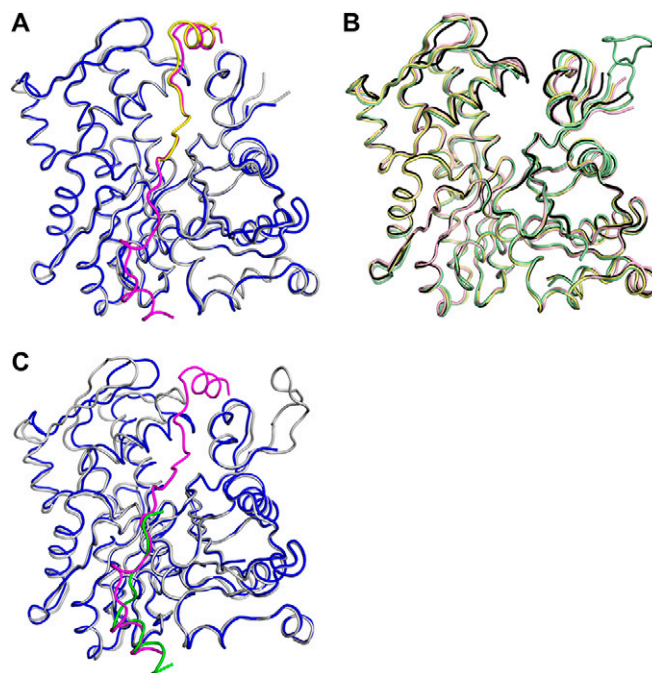

**Fig. S6.** The unique C-terminal  $\alpha$ -helix of T $\beta$ 4. (A and B) The C-terminal  $\alpha$ -helix of T $\beta$ 4 but not G1 induces the closure of the pointed face cleft of actin. (A) The structure of the *P. (Komagataella) pastoris* actin–T $\beta$ 4 hybrid closely resembles that of rabbit skeletal muscle actin bound to a chimera consisting of G1 fused to the C-terminal portion of T $\beta$ 4 (PDB ID code 1T44). The *Pichia* actin–T $\beta$ 4 hybrid is colored blue and magenta for its actin and T $\beta$ 4 portions, respectively. The rabbit skeletal muscle actin is colored gray, and the C-terminal portion of T $\beta$ 4 in the chimera is colored yellow. For clarity, the G1 in the chimera is not shown. (B) In the absence of the C-terminal  $\alpha$ -helix of T $\beta$ 4, the pointed face cleft of actin remains open in G1:actin complexes. Actins from PDB ID codes 1YAG (*Saccharomyces cerevisiae* actin; pale green), 1P8Z (rabbit skeletal muscle actin; light pink), and 2FF3 (rabbit skeletal muscle actin; pale yellow) are compared with that from PDB ID code 1T44 (rabbit skeletal muscle actin; black). (C) The C-terminal  $\alpha$ -helix of T $\beta$ 4 constitutes a major structural difference between T $\beta$ 4 and WH2. The *Pichia* actin–T $\beta$ 4 structure in Fig. 1A and the actin-bound structure of the WH2 motif of WASP are superimposed, with the fully bound T $\beta$ 4, WH2, and their bound actins shown in magenta, green, blue, and gray, respectively.

**Table S1. Summary of MD simulations**

| System                                   | No. of peptide chains | Nucleotide/cation    | System size (atoms) | Total simulation time ( $\mu$ s) |
|------------------------------------------|-----------------------|----------------------|---------------------|----------------------------------|
| <i>Pichia</i> actin                      | 1                     | ATP/Ca <sup>2+</sup> | 50,375              | 0.869                            |
| <i>Pichia</i> actin–profilin             | 2                     | ATP/Ca <sup>2+</sup> | 73,288              | 0.669                            |
| <i>Pichia</i> actin–T $\beta$ 4          | 2                     | ATP/Ca <sup>2+</sup> | 55,638              | 1.150                            |
| <i>Pichia</i> actin–T $\beta$ 4–profilin | 3                     | ATP/Ca <sup>2+</sup> | 76,466              | 1.200                            |
